# Supplementary material for: A PCA3 gene-based transcriptional amplification system targeting primary prostate cancer
Source: PubMed Central journal article supplement (PMC4811461; doi:10.18632/oncotarget.6360), 2015-11-22
Supplement: oncotarget-07-1300-s001.pdf [file oncotarget-07-1300-s001.pdf]

# A *PCA3* gene-based transcriptional amplification system targeting primary prostate cancer

## Supplementary Material

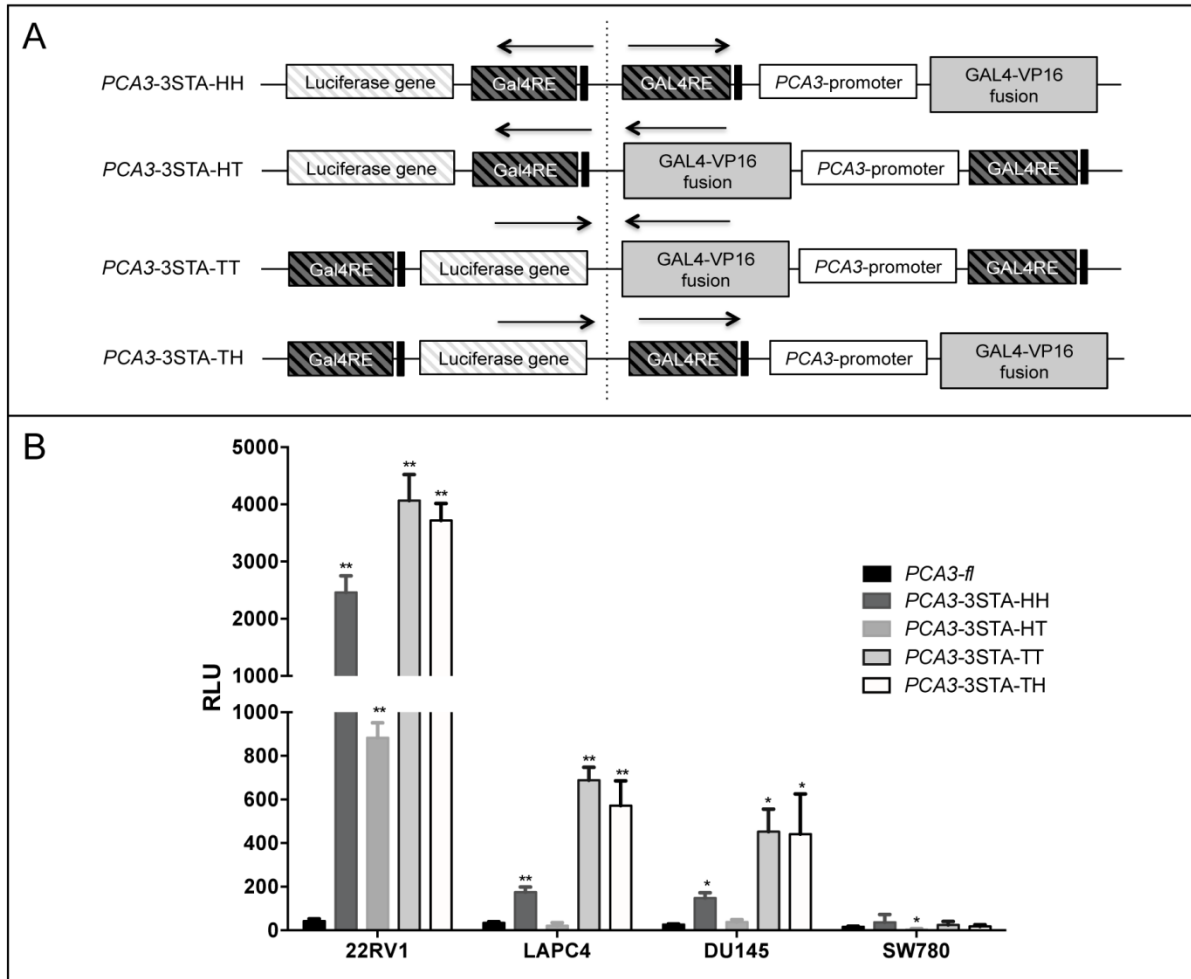

**Supplementary figure 1: Characterization of the *PCA3*-3STA conformations for prostate**

**cancer-specific expression. (A)** Scheme of non-replicative reporter adenoviruses. **(B)** The

amplification provided by the *PCA3*-3STA-TT conformation is significantly higher than *PCA3*-

3STA-HH, *PCA3*-3STA-TH, or *PCA3*-3STA-HT conformations. PCa (22Rv1, LAPC4, DU145)

and non-PCa (SW780) cells were infected with *PCA3-fl*, *PCA3*-3STA-HH, *PCA3*-3STA-TT,

*PCA3*-3STA-TH, or *PCA3*-3STA-HT at 5 MOI. Cells were harvested after 72 h of infection. The

relative fl activity (RLU) was normalized by protein content in each well divided by the SV40

promoter activity in each cell line (RLU= (RLU/ $\mu$ g protein)  $\div$  (RLU SV40/ $\mu$ g)\*100).

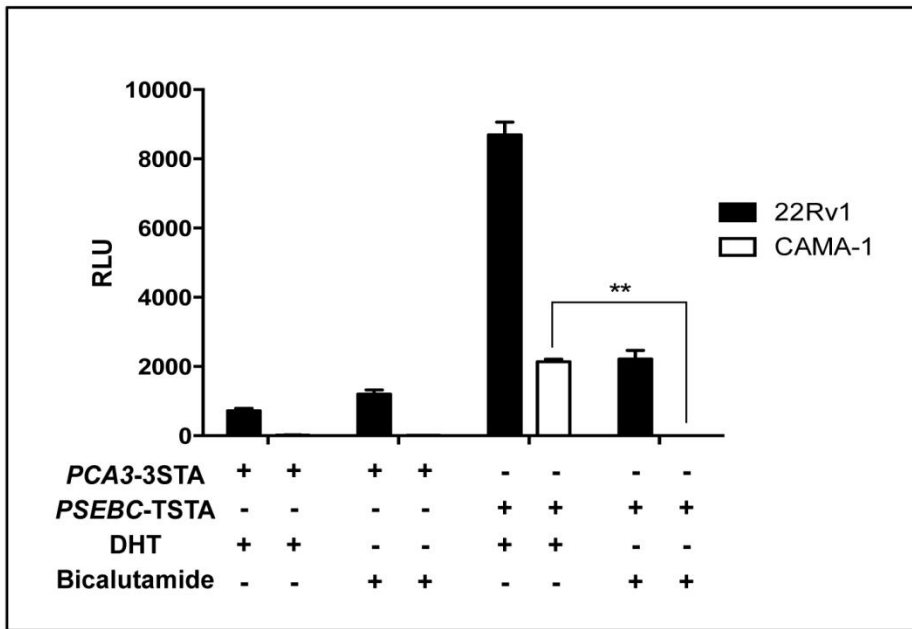

**Supplementary figure 2: PCA3-3STA is prostate cancer specific and not induced by androgens but PSEBC-TSTA is highly induced by androgens.** Androgen receptor positive PCa cells (22Rv1) or androgen receptor positive breast cancer cells (CAMA-1) were infected with either *PSEBC-TSTA* or *PCA3-3STA* at 5 MOI and treated with either DHT (10 nM) or bicalutamide (10  $\mu$ M). The relative fl activity (RLU) was normalized by protein content in each well divided by the SV40 promoter activity in each cell line (RLU = (RLU/ $\mu$ g protein)  $\div$  (RLU SV40/ $\mu$ g)\*100).

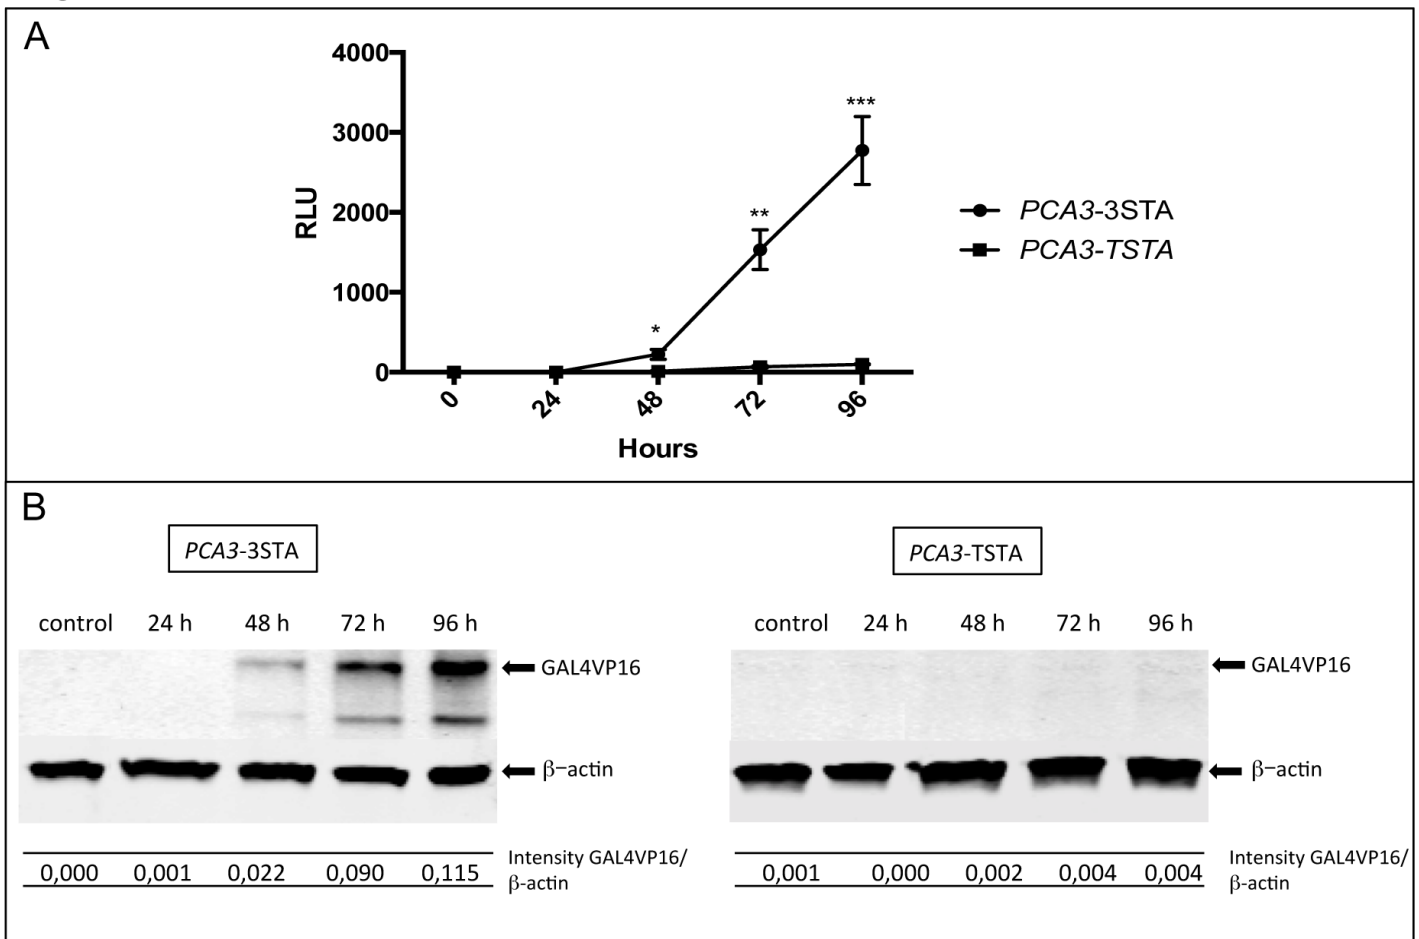

**Supplementary figure 3: The enhanced amplification provided by *PCA3-3STA* compared to that of *TSTA* was detected after 3 days and was secondary to increased *GAL4VP16* protein expression. (A)** 22Rv1 cells were infected with the *PCA3-TSTA* and *PCA3-3STA* adenoviruses and were harvested at the indicated time points, and *fl* activity was measured. After 96 h, *PCA3-3STA* produced a higher signal than did *PCA3-TSTA*. The RLU was normalized by protein content in each well. Each data represents triplicates  $\pm$  SD; \* $p < 0.05$ , \*\* $p < 0.01$ , \*\*\* $p < 0.001$ . (B) Cell extracts harvested above were analyzed by Western blot with anti-VP16 antibody. The intensity of the *GAL4VP16* band was normalized for the  $\beta$ -actin levels.

**Table S1**

**Clinical and histopathological informations of patients from which prostate tissue was sampled.**

| <b>Patient number</b> | <b>Age (years)</b> | <b>PSA (ng/mL)</b> | <b>Surgery</b>        | <b>Indication</b> | <b>Prostate cancer in sampled zone</b> | <b>Gleason score</b> |
|-----------------------|--------------------|--------------------|-----------------------|-------------------|----------------------------------------|----------------------|
| <b>1</b>              | 65                 | 8,2                | Radical Prostatectomy | Prostate Cancer   | Yes                                    | 3+4                  |
| <b>2</b>              | 70                 | 8,4                | Radical Prostatectomy | Prostate Cancer   | Yes                                    | 4+3                  |
| <b>3</b>              | 58                 | 5,9                | Radical Prostatectomy | Prostate Cancer   | Yes                                    | 3+4                  |
| <b>4</b>              | 76                 | 10,0               | Radical Prostatectomy | Prostate Cancer   | Yes                                    | 4+3                  |
| <b>5</b>              | 74                 | –                  | Cystoprostatectomy    | Bladder Cancer    | No                                     | –                    |
| <b>6</b>              | 68                 | –                  | Cystoprostatectomy    | Bladder Cancer    | No                                     | –                    |
| <b>7</b>              | 73                 | –                  | Cystoprostatectomy    | Bladder Cancer    | No                                     | –                    |
| <b>8</b>              | 79                 | –                  | Cystoprostatectomy    | Bladder Cancer    | No                                     | –                    |
| <b>9</b>              | 83                 | –                  | Cystoprostatectomy    | Bladder Cancer    | No                                     | –                    |
